# Supplementary material
Source: PubMed Central journal article supplement (PMC5512811)
Supplement: khvi-13-07-1299299-s001.pdf [file khvi-13-07-1299299-s001.pdf]

## Supplementary Materials

Figure S1

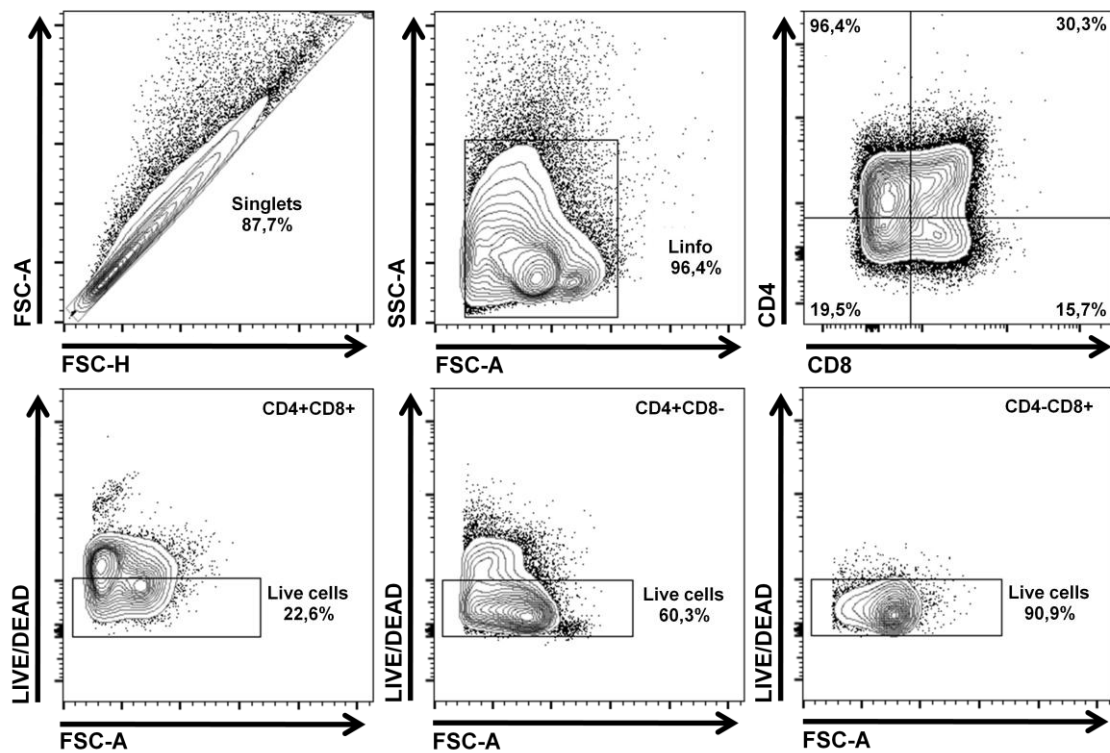

**Figure S1: Illustrative contour plots of gating strategy to identify  $\alpha\beta$ T cells populations on thymus and their viability after 7 days of culture.** Upper panels represent gate strategy, each sample was acquired in the singlet cells gate (determined by FSC-A/FSC-H parameters), then in the lymphocytes gate (determined by their relative size/granularity), and then gated as CD8-CD4+ cells (TCD4+), CD8+CD4+ (TDP) or CD8+CD4- (TCD8). The viability where evaluated on each population using LIVE/DEAD (PE-Texas red) staining as indicated on the lower panels.

Figure S2

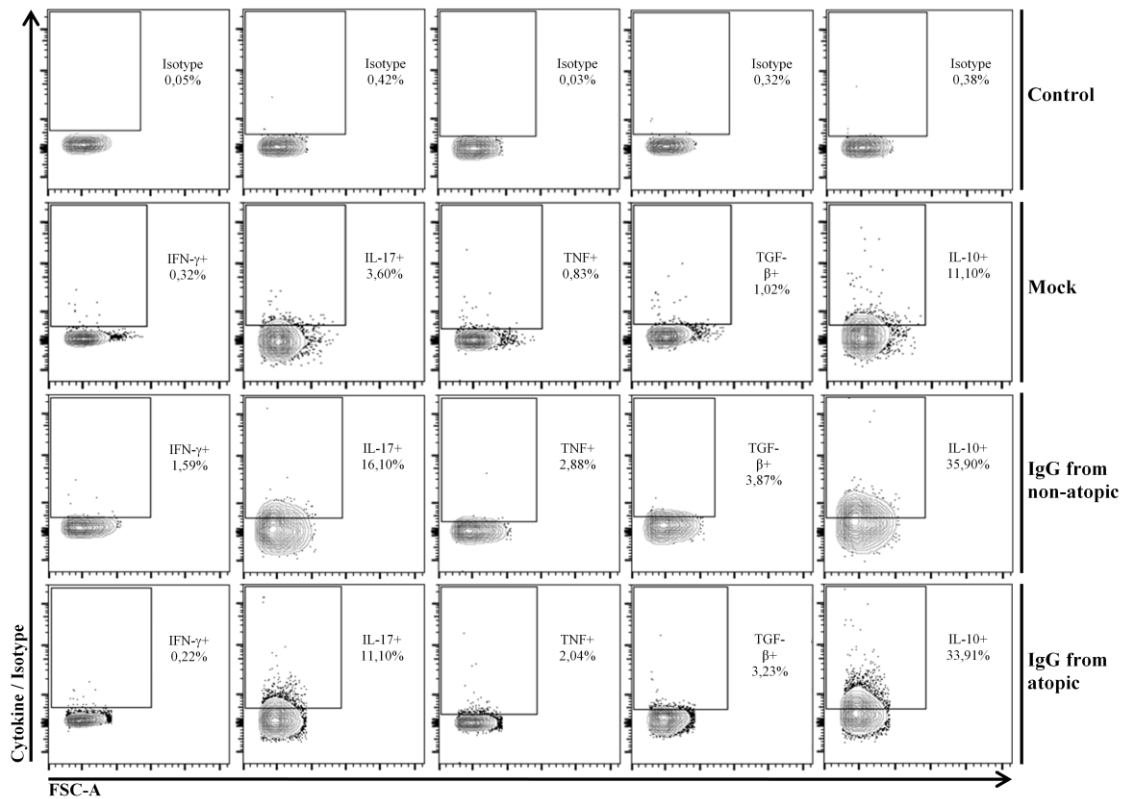

**Figure S2: Illustrative contour plots of the effect of purified IgG on cytokine production by intra-thymic TDP cells after 7 days of culture.** Each sample was acquired in the singlet cells gate (determined by FSC-A/FSC-H parameters), then in the viable cells gate, then in the lymphocytes gate (determined by their relative size/granularity), and then gated as CD8+CD4+ cells (TDP cells). TDP cell cytokine gating was determined using isotype controls on cells from mixed culture conditions (upper panels), and cytokines of cells from each culture condition (i.e., mock, non-atopic IgG and atopic IgG cultures) were measured accordingly, as indicated on the lower panels.

Figure S3

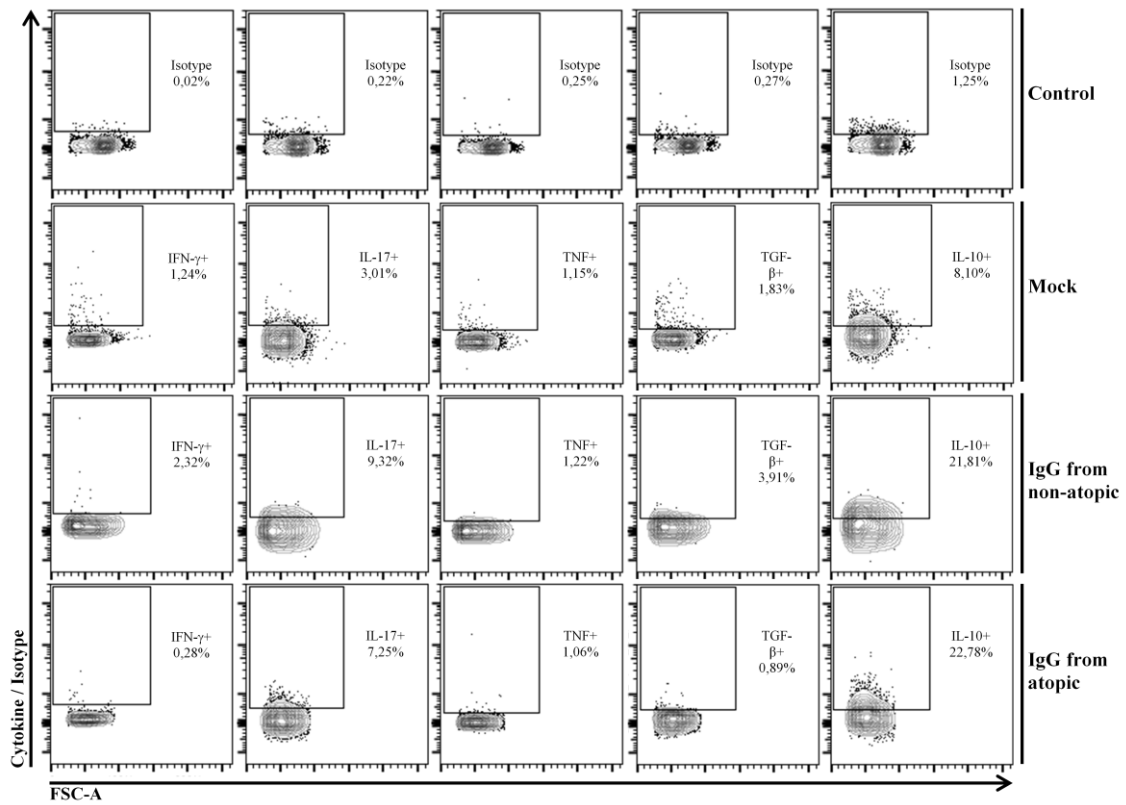

**Figure S3: Illustrative contour plots of the effect of purified IgG on cytokine production by intra-thymic TCD4 cells after 7 days of culture.** Each sample was acquired in the singlet cells gate (determined by FSC-A/FSC-H parameters), then in the viable cells gate, then in the lymphocytes gate (determined by their relative size/granularity), and then gated as CD8-CD4<sup>+</sup> cells (TDP cells). TDP cell cytokine gating was determined using isotype controls on cells from mixed culture conditions (upper panels), and cytokines of cells from each culture condition cells (i.e., mock, non-atopic IgG and atopic IgG cultures) were measured accordingly, as indicated on the lower panels.

Figure S4

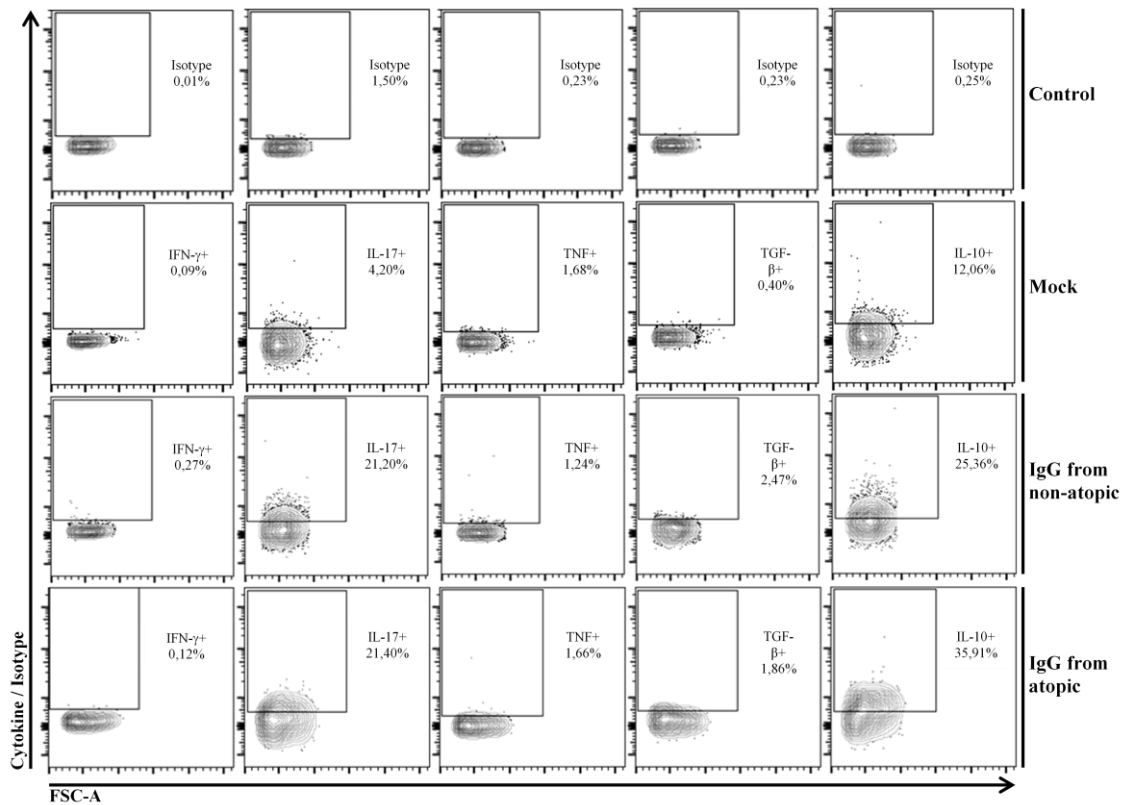

**Figure S4: Illustrative contour plots of the effect of purified IgG on cytokine production by intra-thymic TCD8 cells after 7 days of culture** Each sample was acquired in the singlet cells gate (determined by FSC-A/FSC-H parameters), then in the viable cells gate, then in the lymphocytes gate (determined by their relative size/granularity), and then gated as CD8+CD4- cells (TDP cells). TDP cell cytokine gating was determined using isotype controls on cells from mixed culture conditions (upper panels), and cytokines of cells from each culture condition cells (i.e., mock, non-atopic IgG and atopic IgG cultures) were measured accordingly, as indicated on lower panels.
